# Supplementary material for: Optimization of polarization behavior in (1 − x)BSBNT–xNN ceramics for pulsed power capacitors
Source: Royal Society of Chemistry journal article supplement (doi:10.1039/d0tc01699c), 2020-01-01
Supplement: d0tc01699c1.pdf [file d0tc01699c1.pdf]

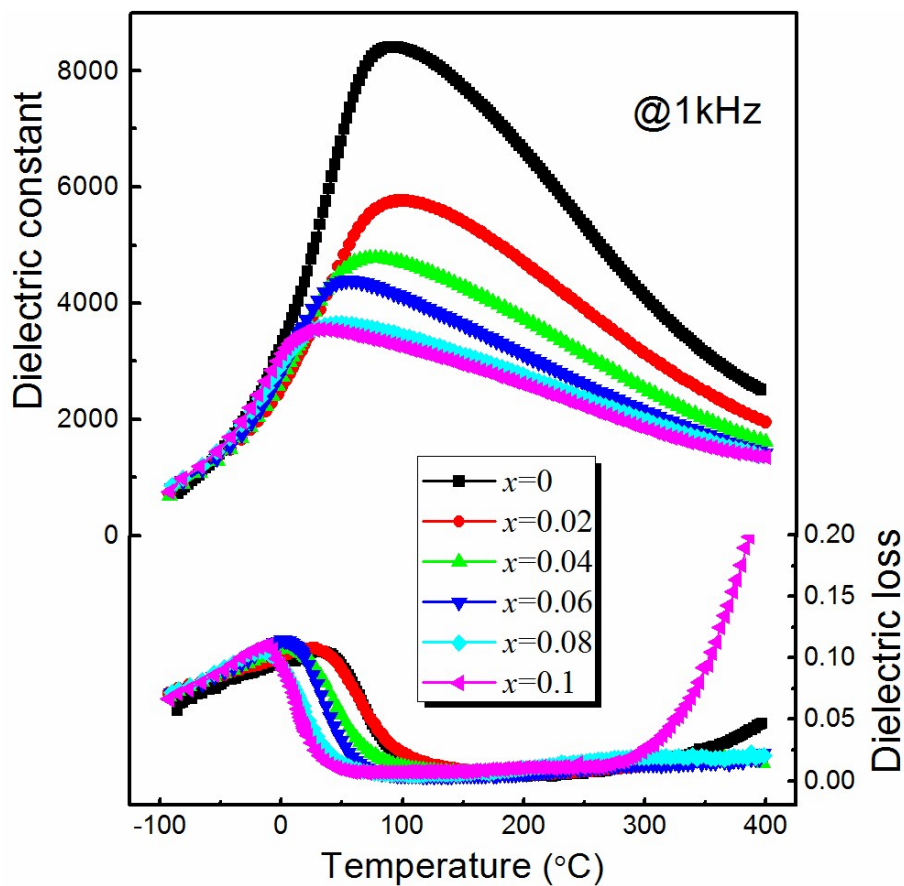

Fig. S1 Temperature dependent dielectric constant and loss of  $(1-x)$ BSBNT- $x$ NN ceramics at 1 kHz.

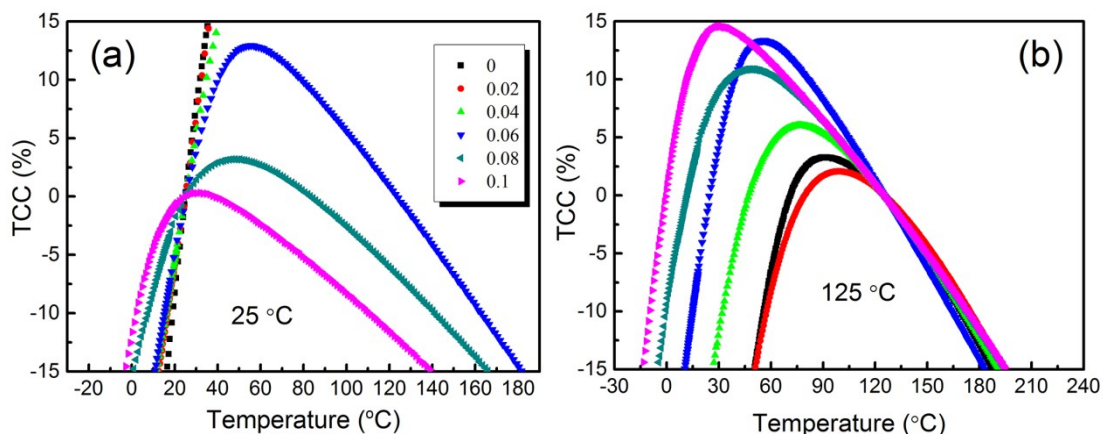

Fig. S2 Temperature stability of dielectric constant for  $(1-x)$ BSBNT- $x$ NN ceramics chosen (a) 25 °C and (b) 125 °C as based temperature, respectively.

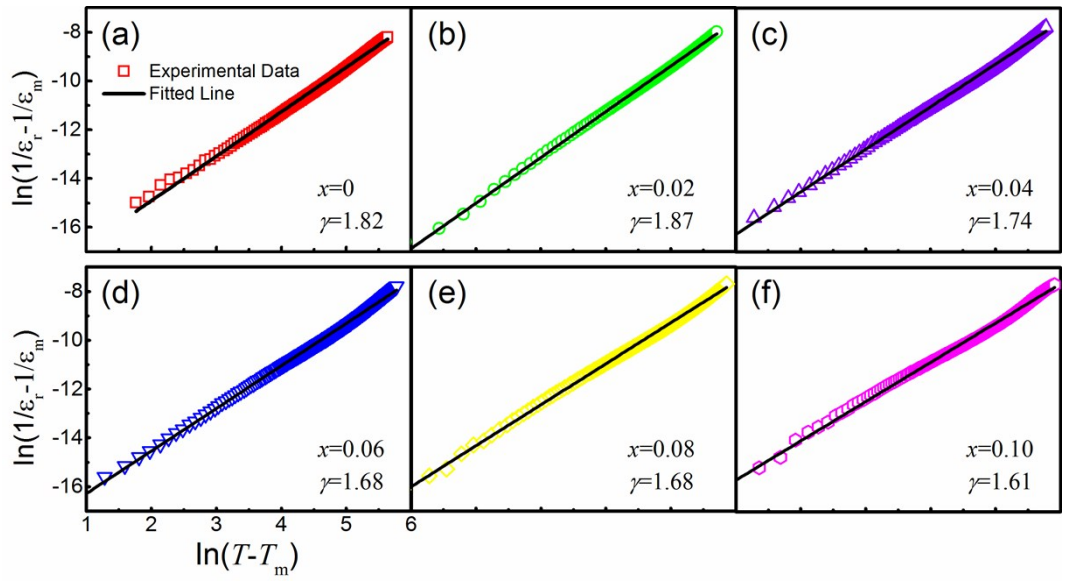

Fig. S3 The fitted pattern of  $\ln(1/\epsilon_r - 1/\epsilon_m)$  versus  $\ln(T - T_m)$  for  $(1-x)\text{BSBNT}-x\text{NN}$  ceramics at 1 kHz.
